# Supplementary material
Source: PubMed Central journal article supplement (PMC4050520)
Supplement: supp_jlb.0712360_jlb.0712360SuppData.pdf [file supp_jlb.0712360_jlb.0712360SuppData.pdf]

Supplemental Figure 1

A

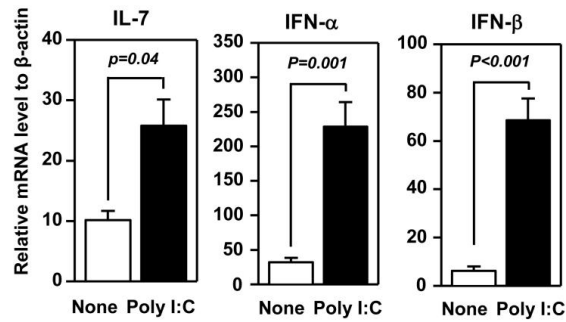

B

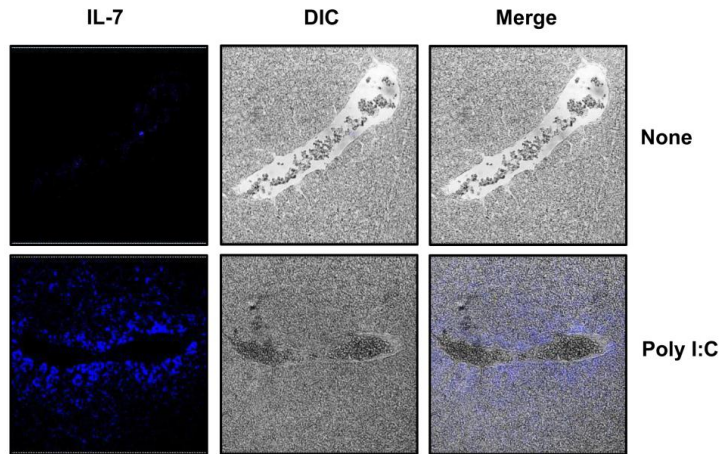

**Fig S1. Poly I:C enhances IL-7 production in liver.** (A) Real-time PCR analysis of gene expression in liver from C57BL/6 mice that have received *i.p.* injection of poly I:C 6 hours earlier, presented relative to that of  $\beta$ -actin. Data are representative of analyses of 6 individual mice in 2 independent experiments. (B) Immunofluorescence staining of IL-7 in liver sections from C57BL/6 mice that have received *i.p.* injection of poly I:C 24 hours earlier. Data are representative of analyses of 6 individual mice in 2 independent experiments.



Supplemental Figure 2

A

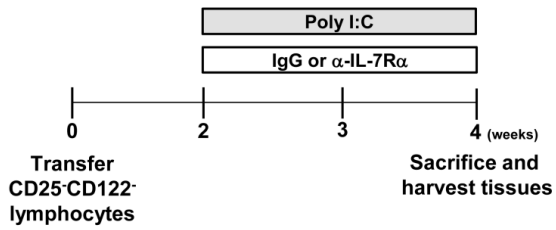

B

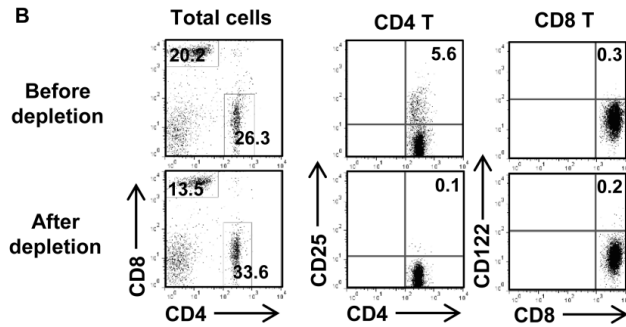

**Fig. S2 Design of *in vivo* model of autoimmune inflammation.** (A) Scheme of the *in vivo* model to study effect of poly I:C on autoimmune tissue inflammation. (B) Spleen and total LN were harvested from C57/B6 mice. CD25<sup>+</sup> and CD122<sup>+</sup> regulatory T cells were depleted by negative selection and the resulting CD25<sup>-</sup>CD122<sup>-</sup> cells were transferred into RAG1<sup>-/-</sup> mice. Two weeks after the transfer, mice were administered with 20  $\mu$ g poly I:C plus IgG or anti-IL-7R $\alpha$  regularly for 2 more weeks and then sacrificed for analysis. (B) Flow cytometry of splenocytes and LN cell mixtures before and after depletion of CD25<sup>+</sup> and CD122<sup>+</sup> regulatory T cells.

Supplemental Figure 3

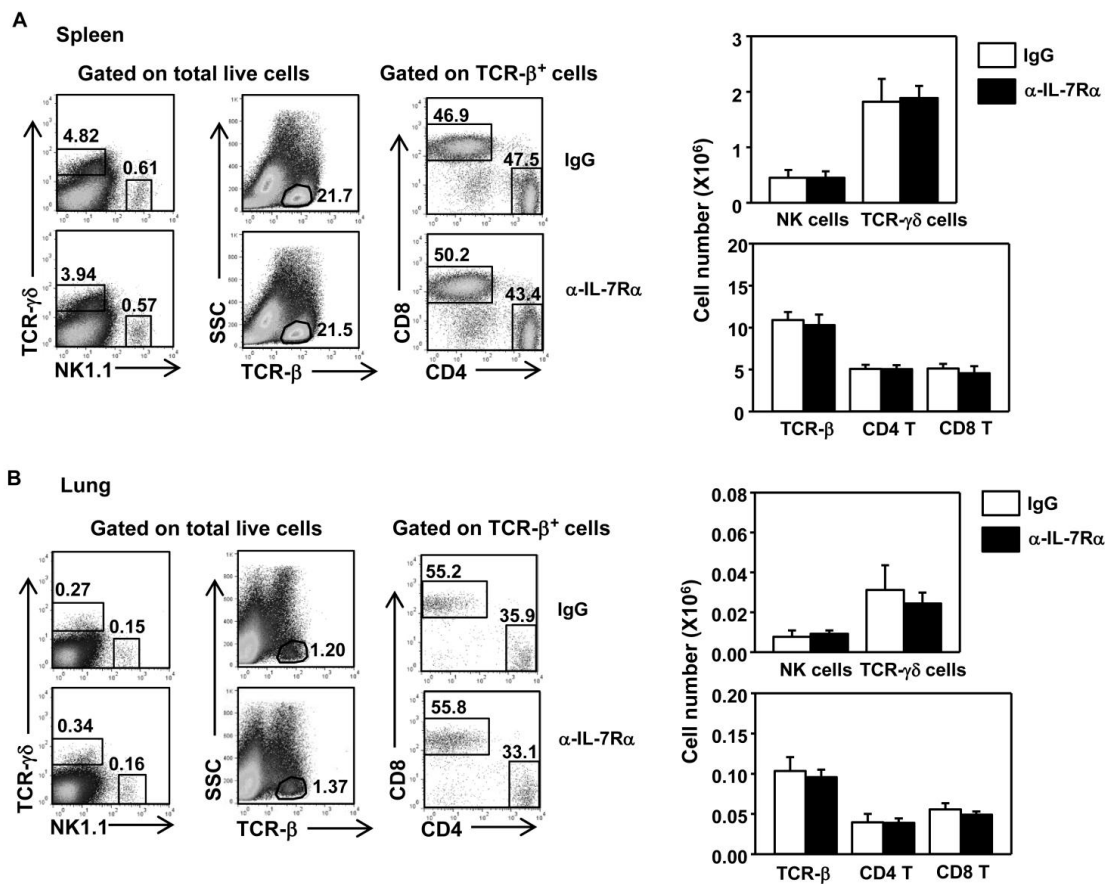

**Fig. S3 Anti-IL-7R $\alpha$  treatment (50  $\mu$ g) does not affect the numbers of T cells in the absence of poly I:C treatment.** CD25<sup>-</sup>CD122<sup>-</sup> cells from C57/B6 mice were transferred into RAG1<sup>-/-</sup> mice. Two weeks after the transfer, mice were administered regularly with either IgG or anti-IL-7R $\alpha$  for 2 more weeks and then sacrificed for analysis. Flow cytometric analysis of leukocyte populations in spleen (A) and lung (B), with the gating indicated above the plots. Bar graphs show the absolute number of each cell population in the spleen or 1 lobe of the lung (2-3 mice per experiment, total 2 independent experiments).

Supplemental Figure 4

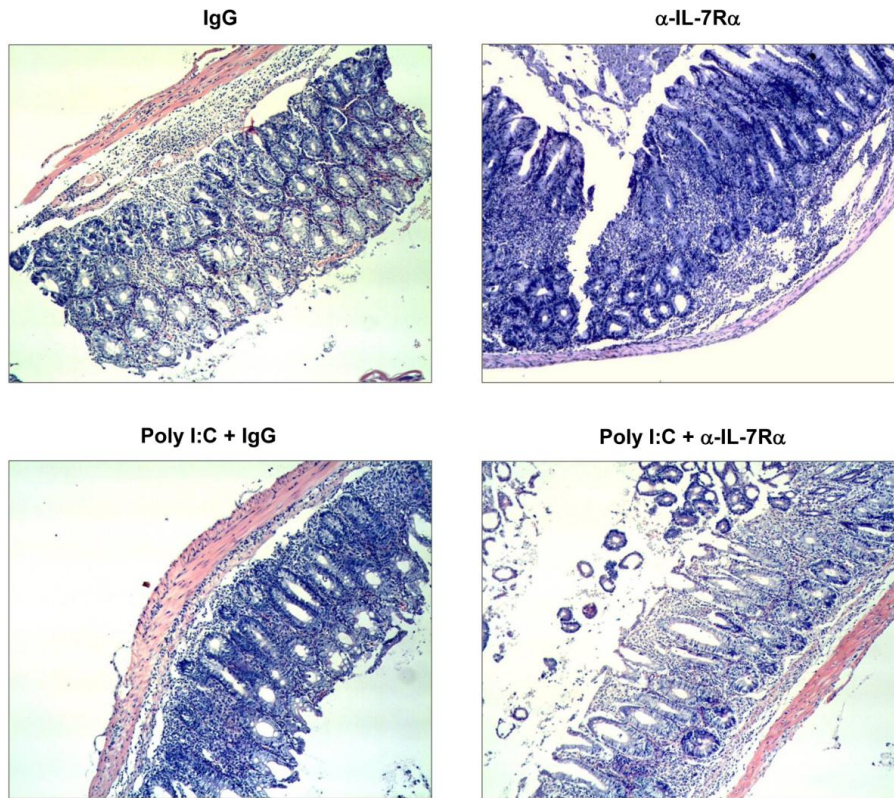

**Fig. S4 Anti-IL-7R $\alpha$  treatment (50  $\mu$ g) does not affect the severity of intestinal inflammation.** CD25<sup>+</sup>CD122<sup>-</sup> cells from C57/B6 mice were transferred into RAG1<sup>-/-</sup> mice. Two weeks after the transfer, mice were administered regularly with either IgG or anti-IL-7R $\alpha$ , in the absence or presence of poly I:C treatment for 2 more weeks. Inflammation of colon was assessed by H&E staining. Data are representative of 6 independent analyses (1- 2 mice per experiment, total 4 independent experiments).
